# Supplementary material
Source: MDPI journal article supplement (https://www.mdpi.com/2076-3417/12/5/2468)

**SUPPLEMENTARY MATERIAL 2.**

**Deep denaturation (NaOH)**

RE – right eye (Solcoseryl)

LE – left eye (vehiculum)

RE, 1 week

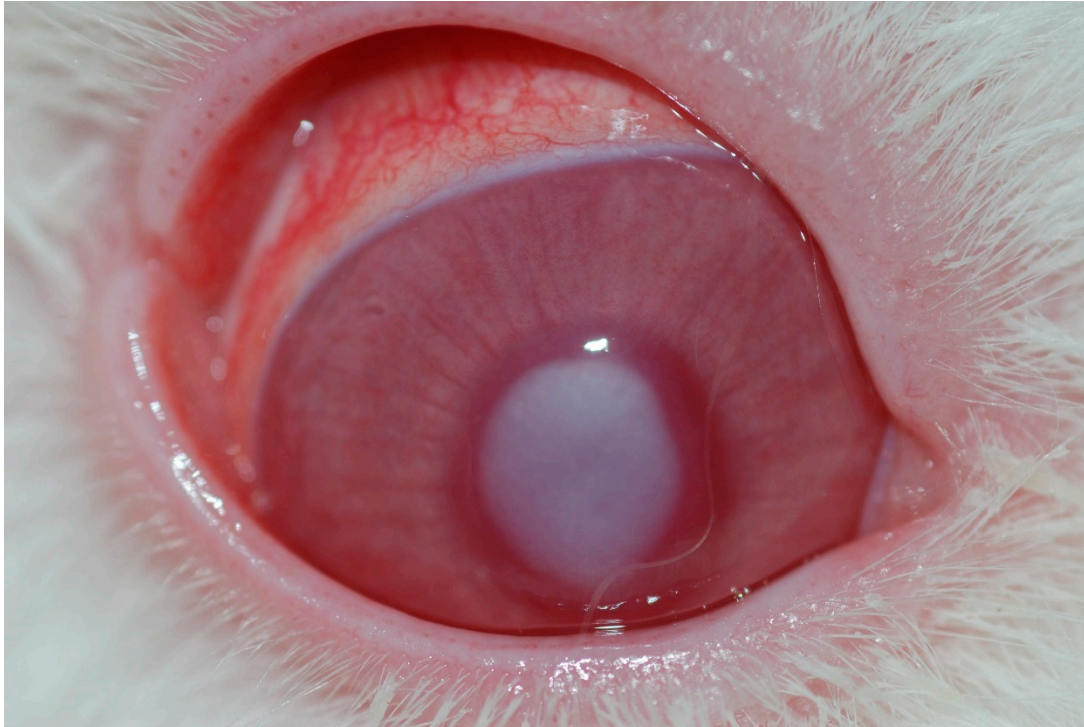

LE, 1 week

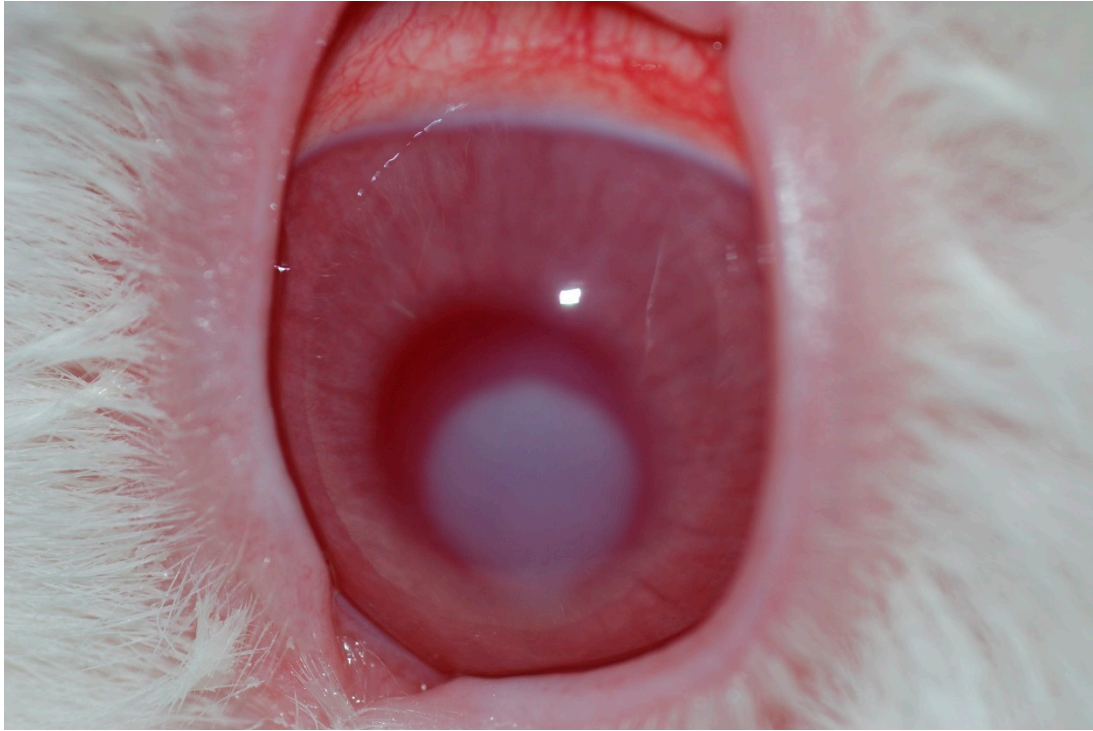

RE, 2 week

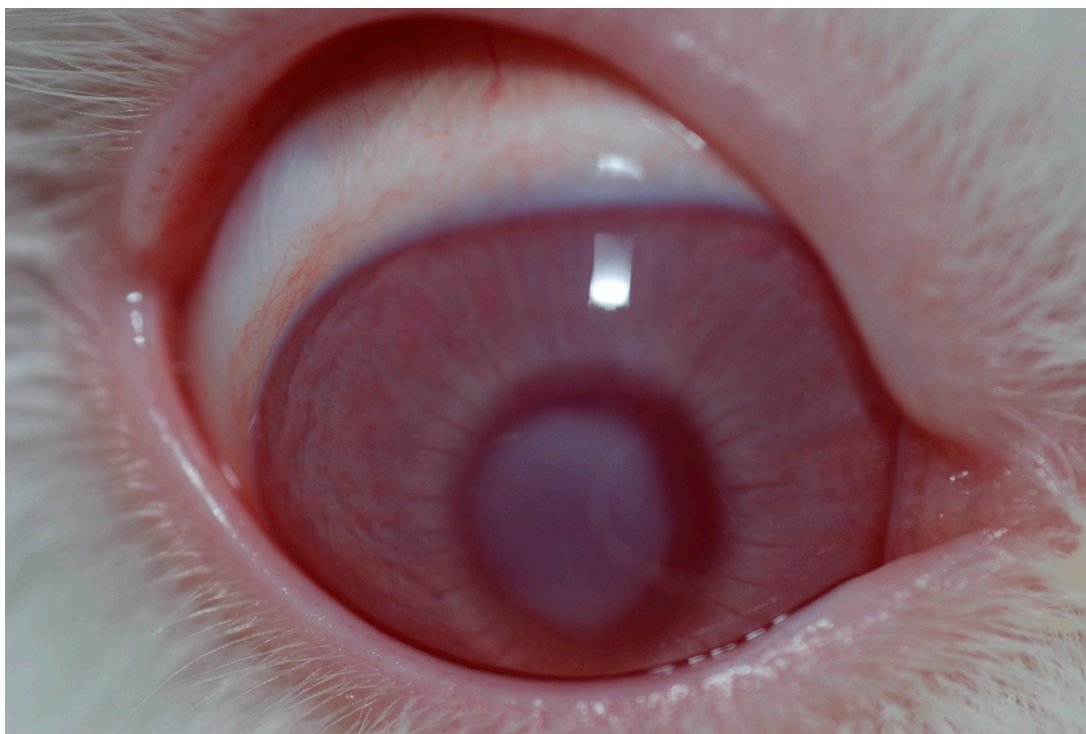

LE, 2 week

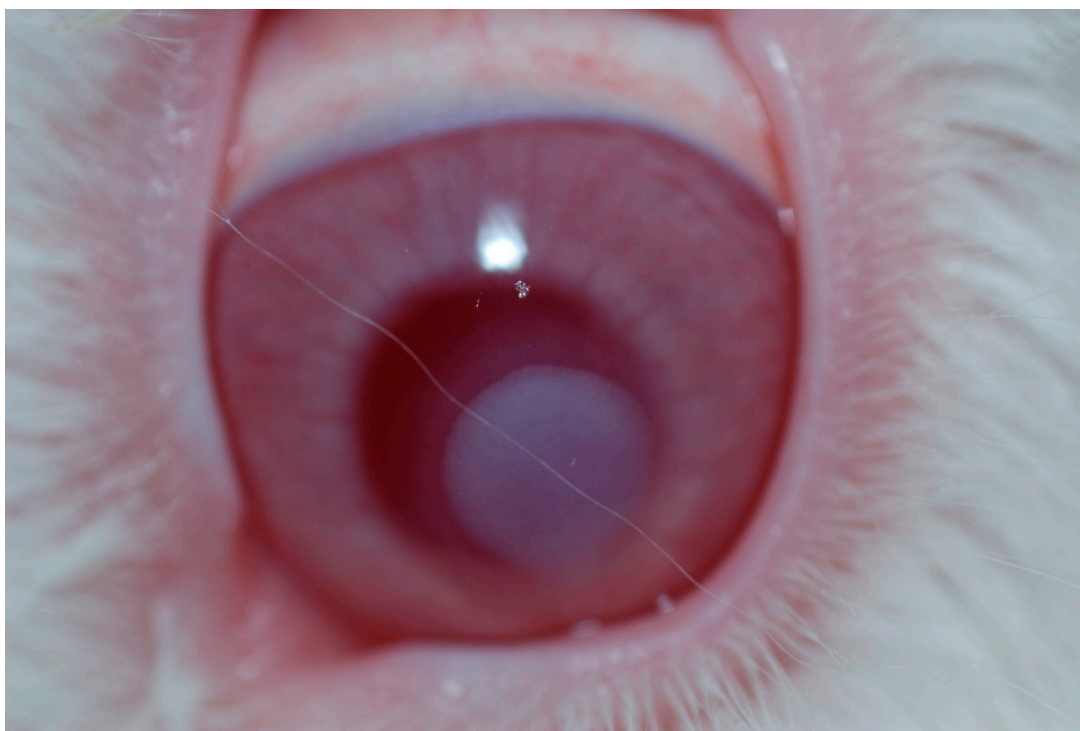



RE, 3 week

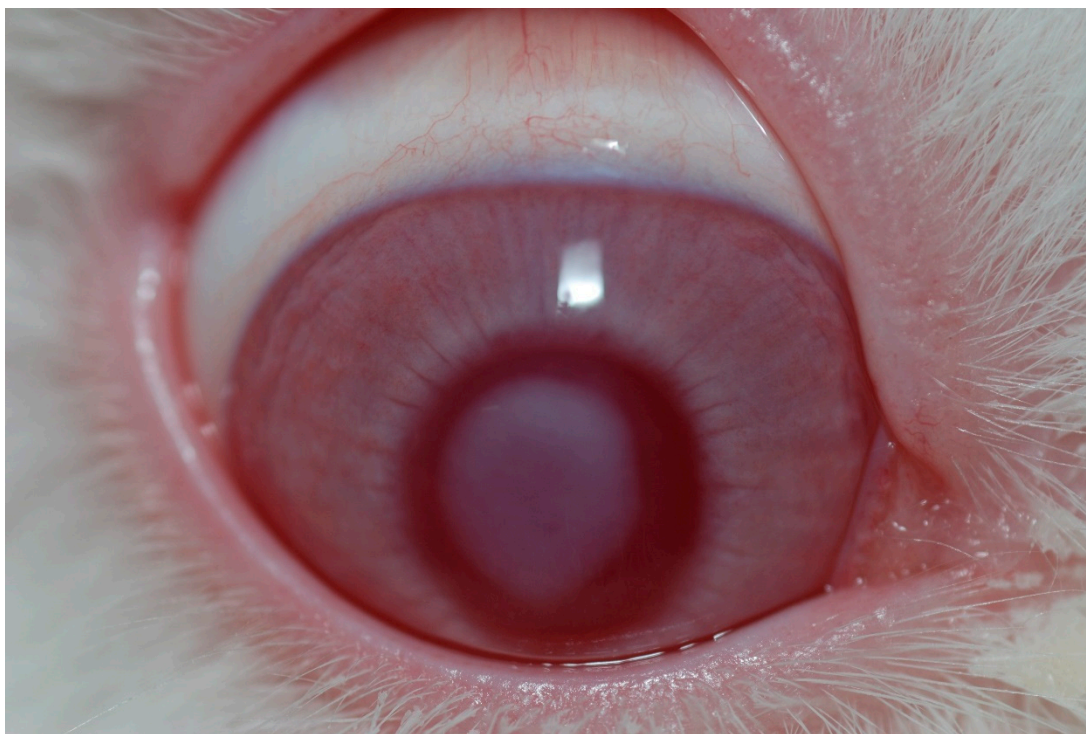

LE, 3 week

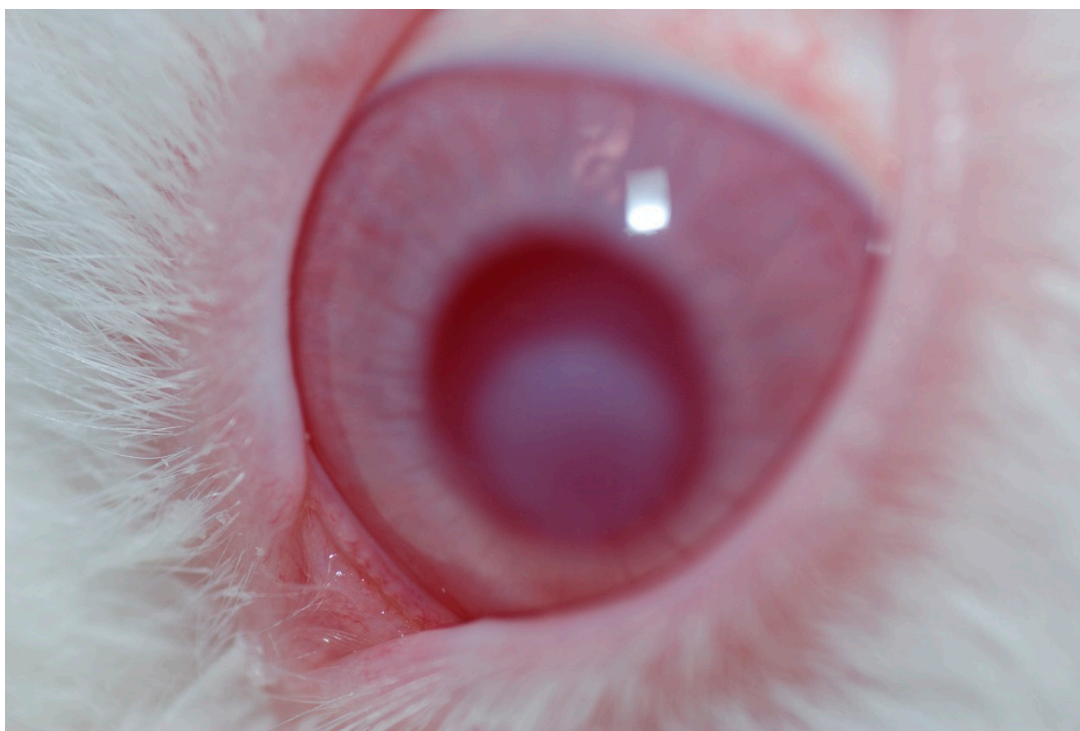

RE, 4 week

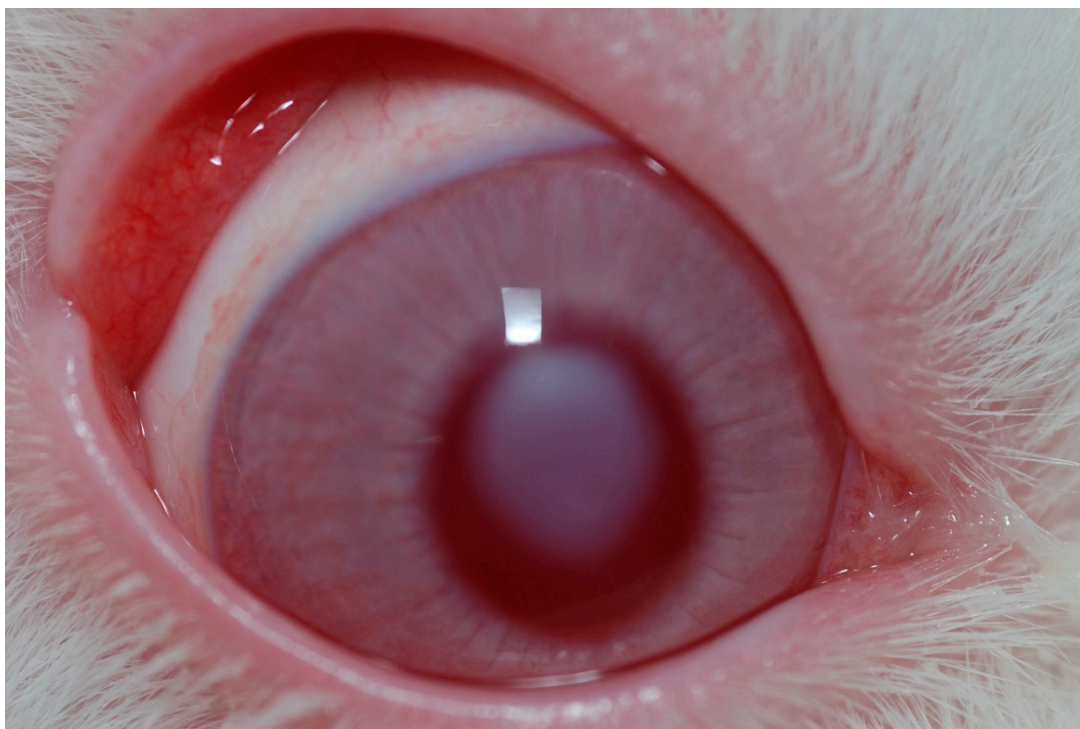

LE, 4 week

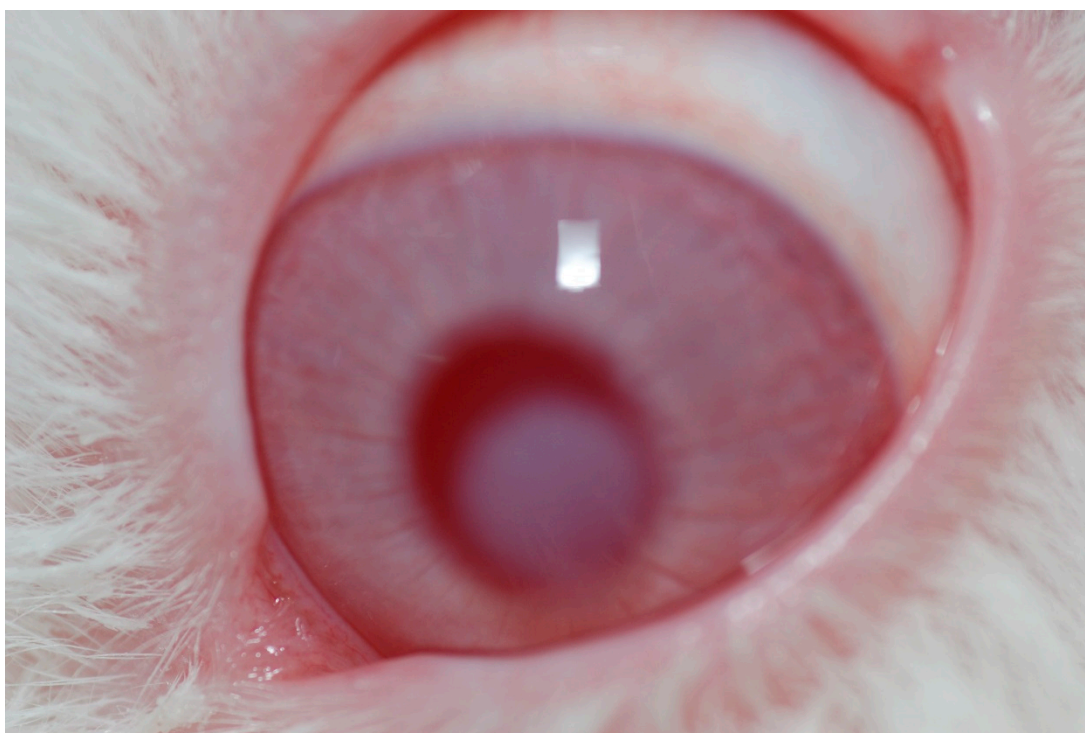



RE, 5 week

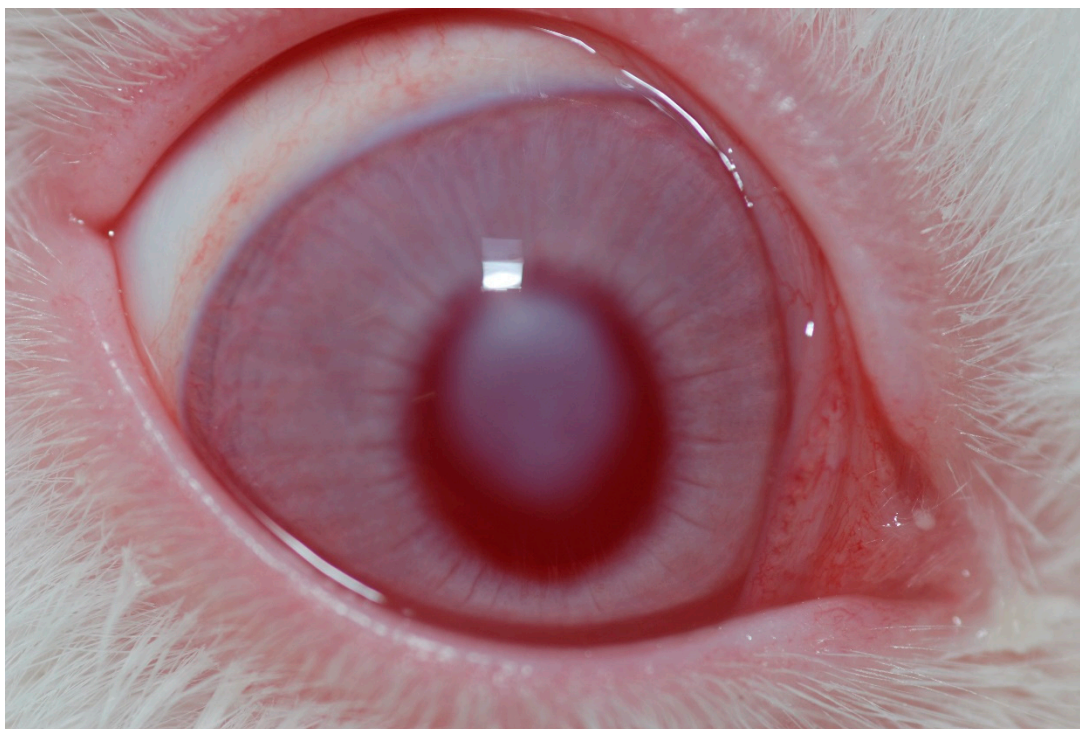

LE, 5 week

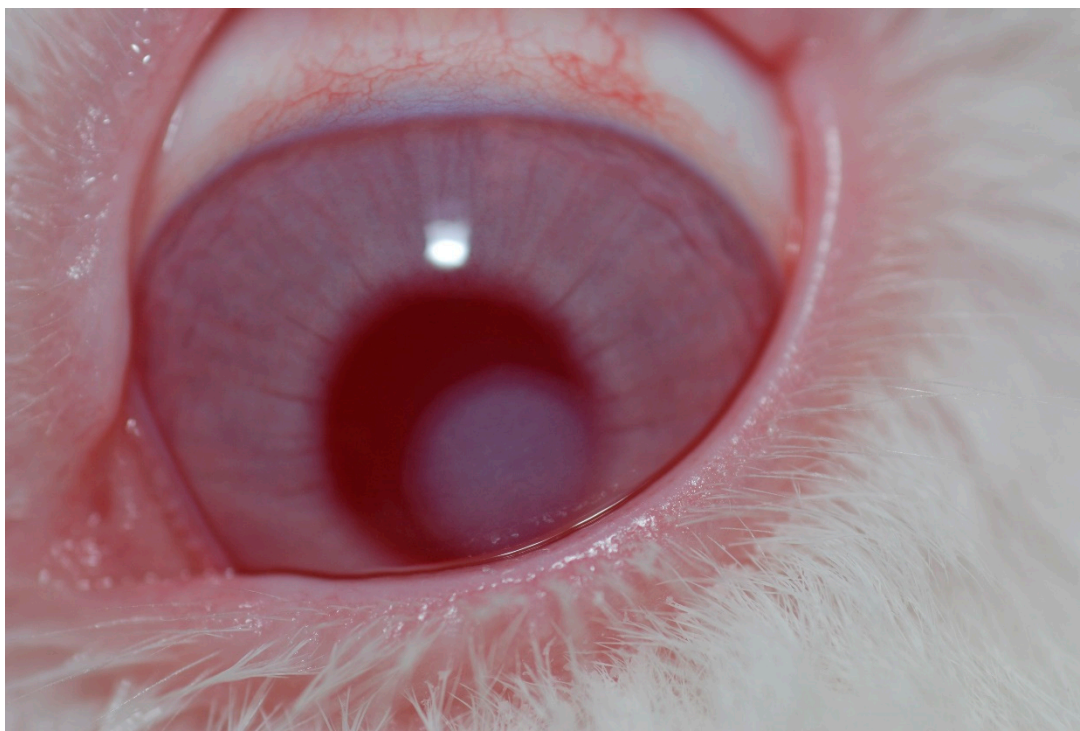

RE, 6 week

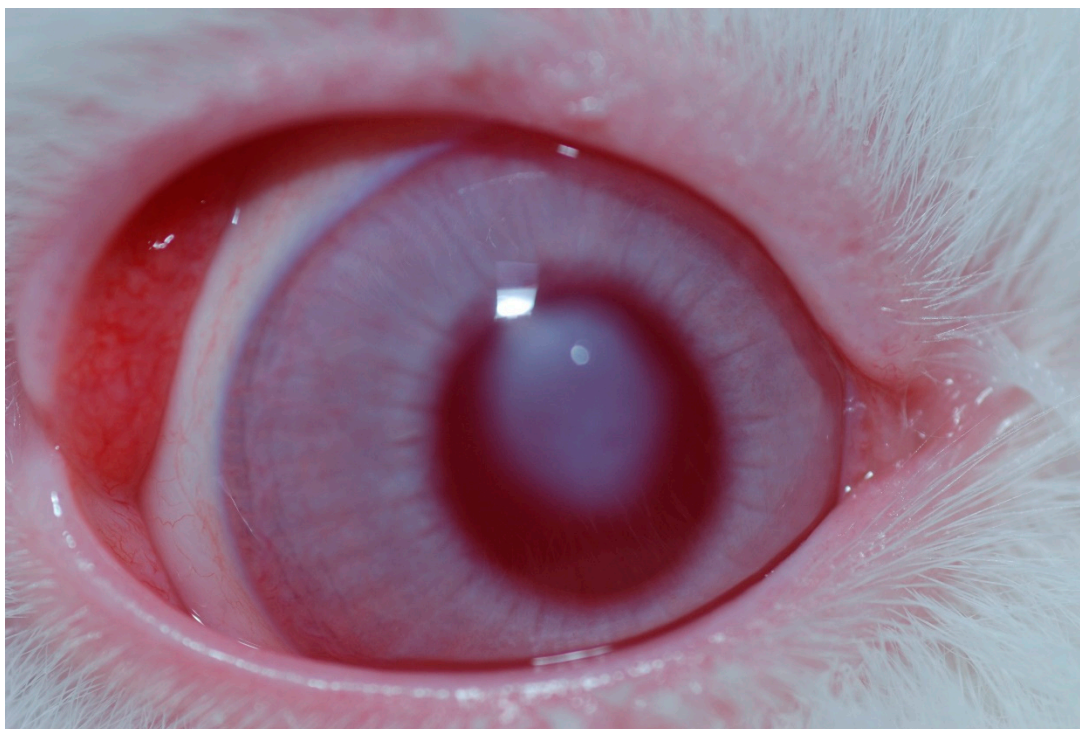

LE, 6 week

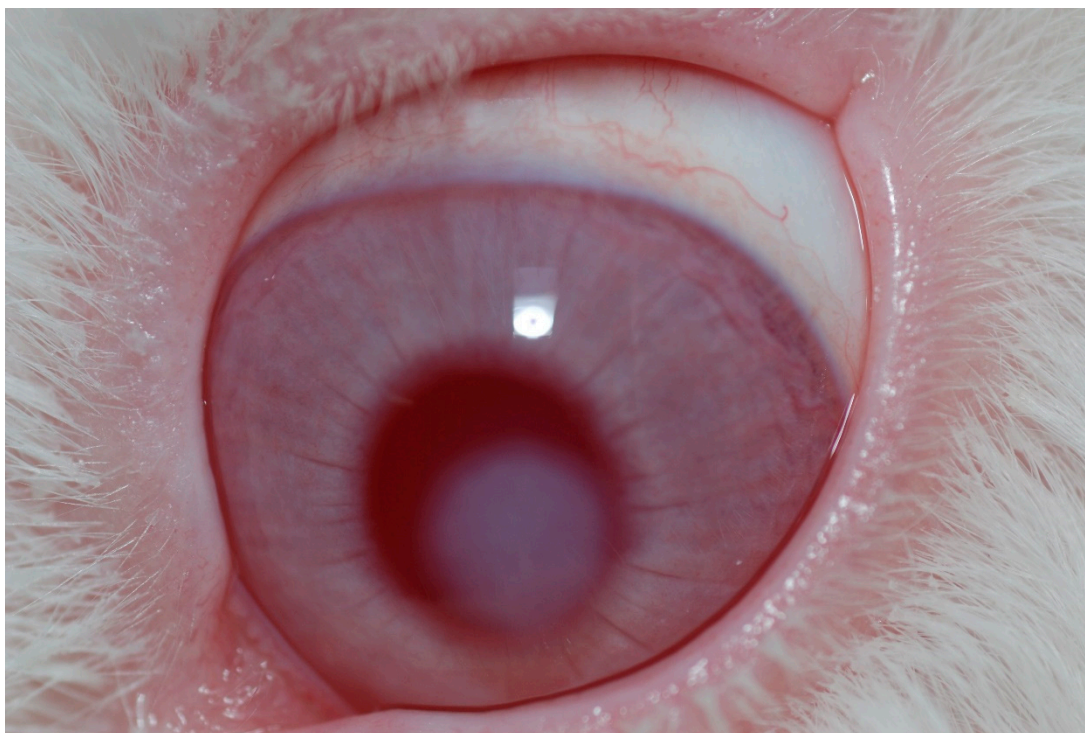



RE, 7 week

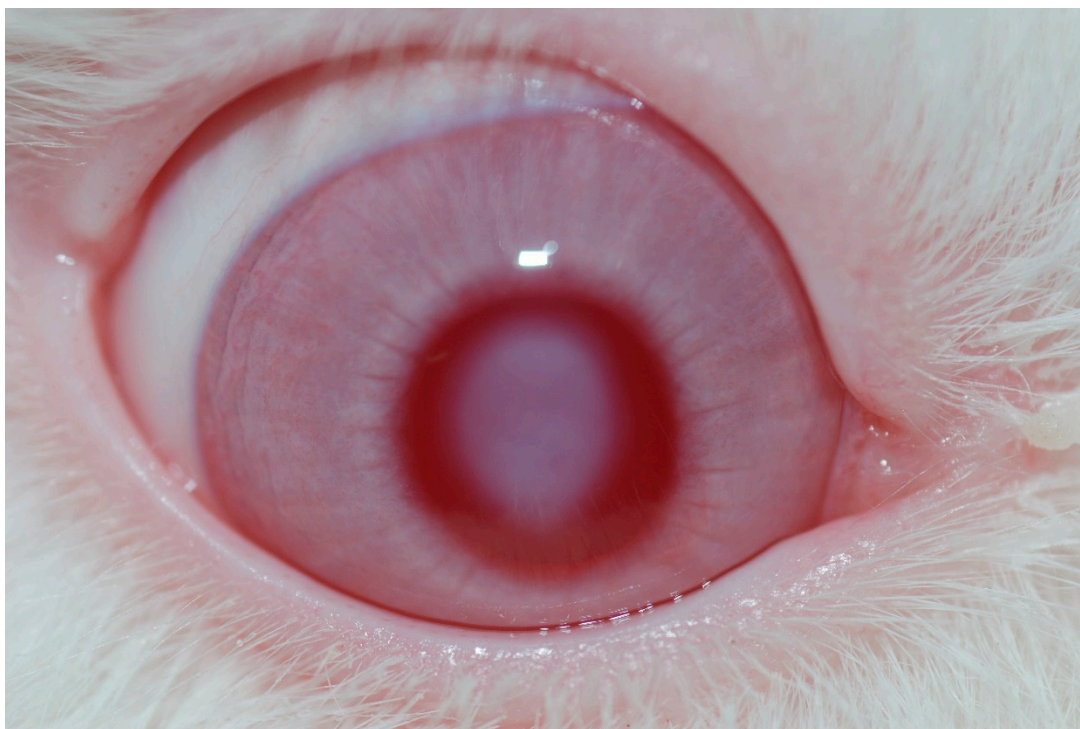

LE, 7 week

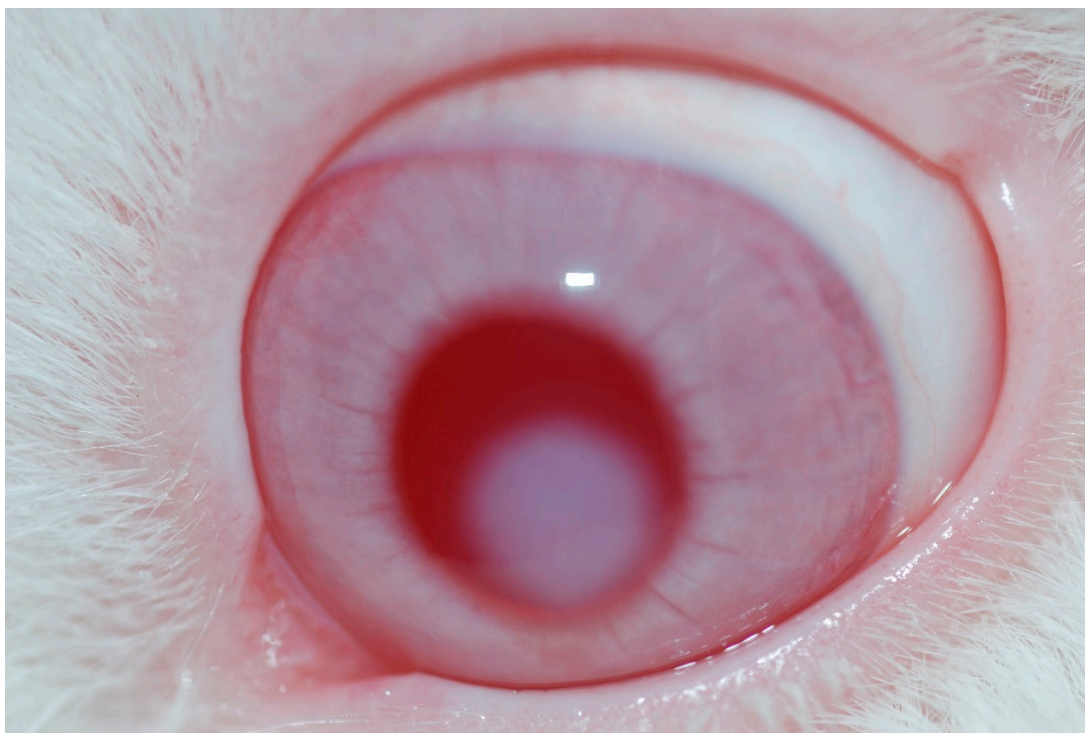



RE, 8 week

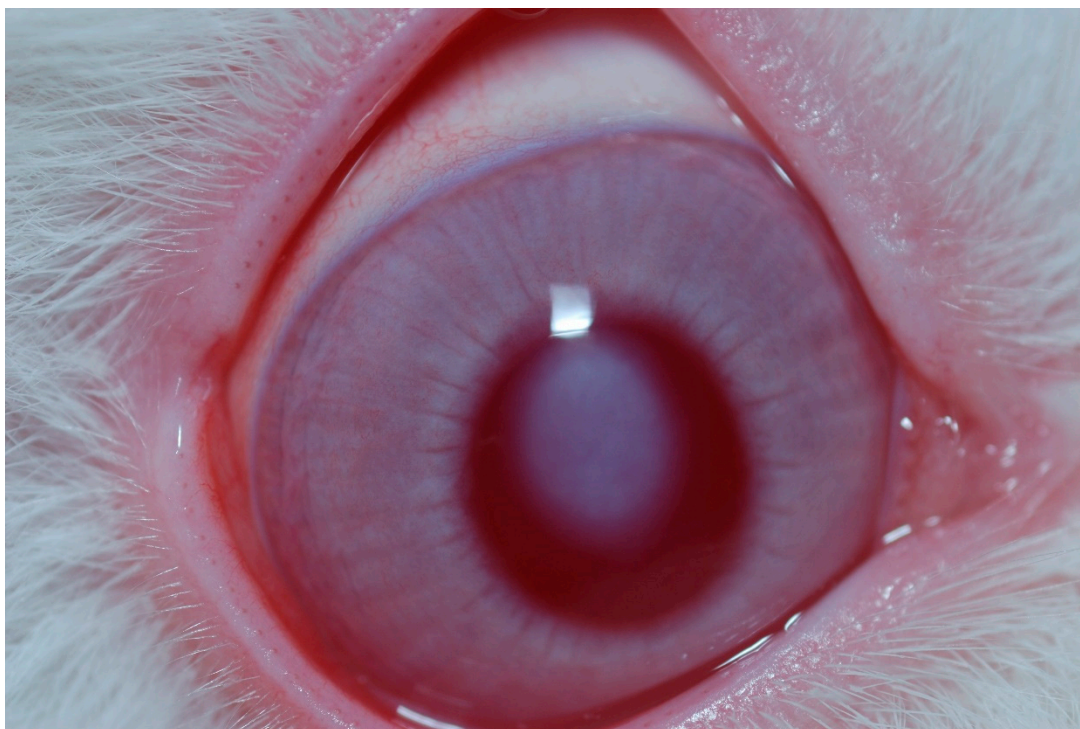

LE, 8 week

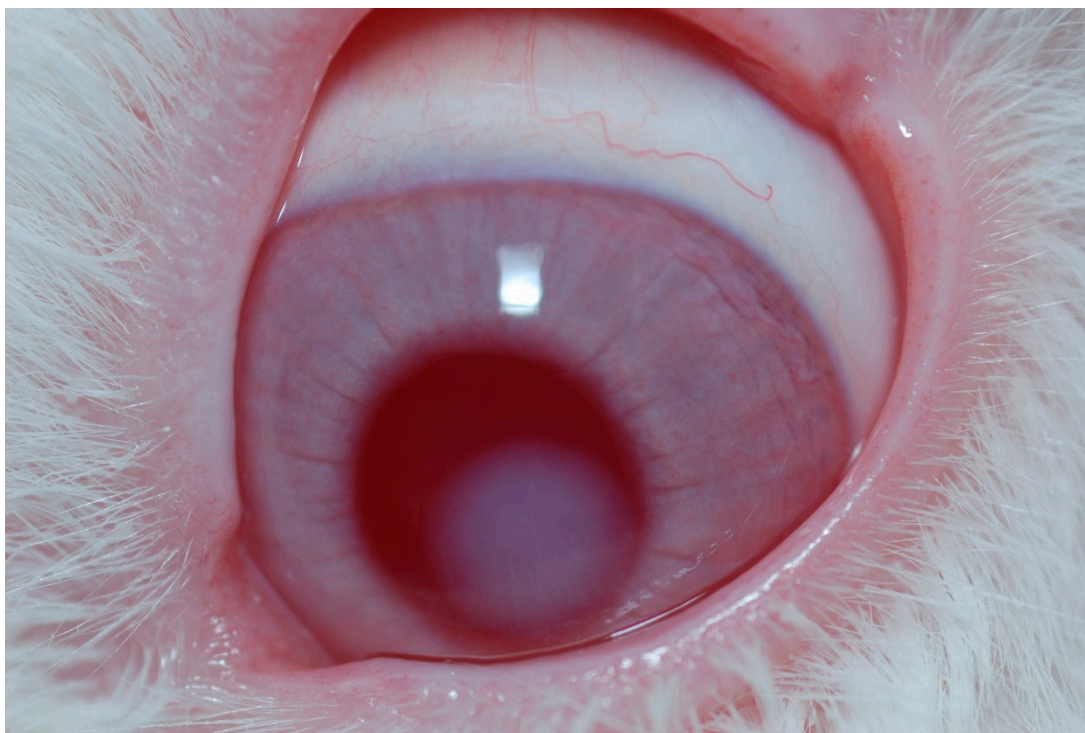

RE, 9 week

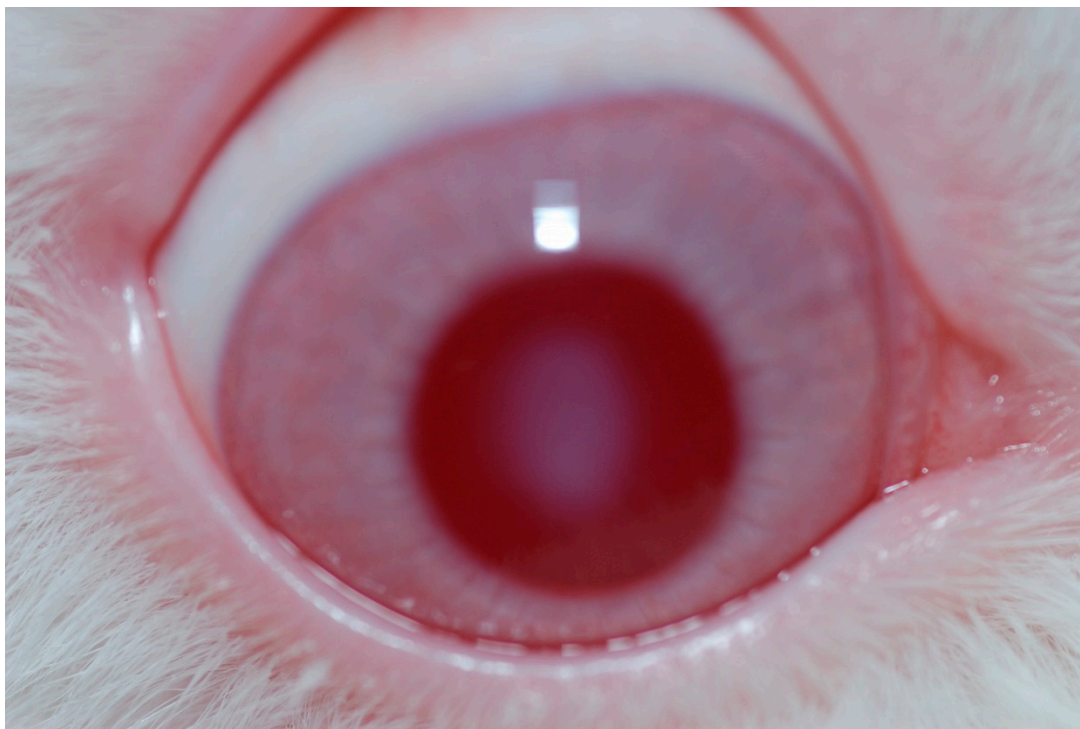

LE, 9 week

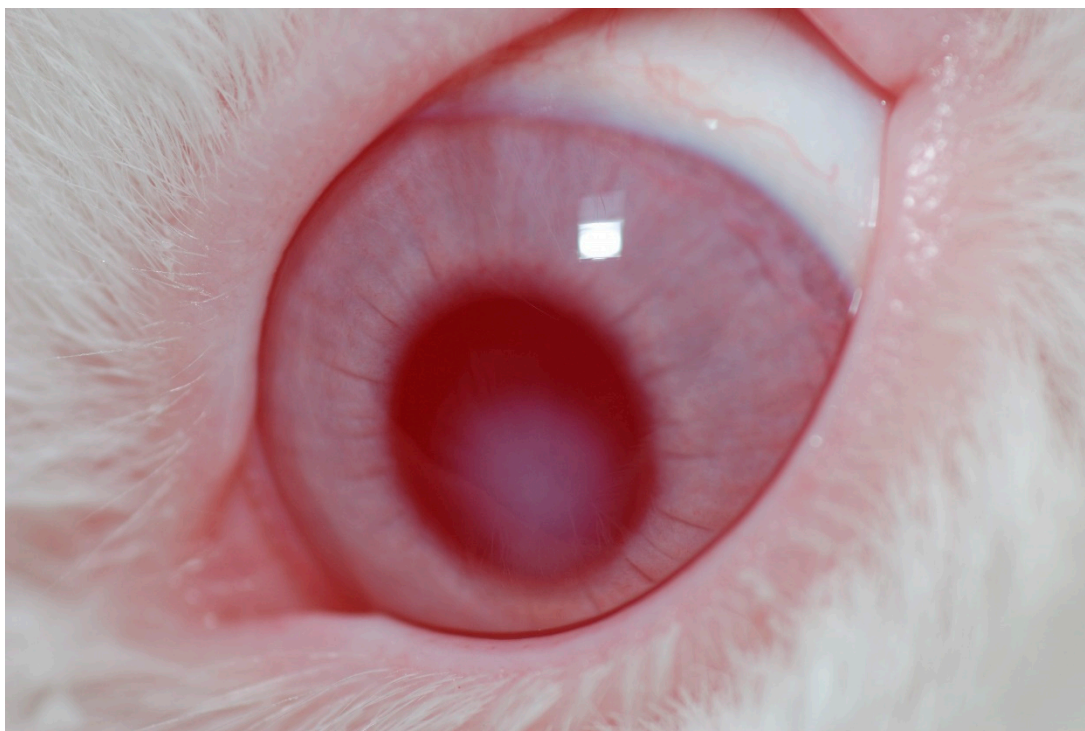

Supplement: s1 [file s1]
