# Supplementary material
Source: MDPI journal article supplement (https://www.mdpi.com/2076-3417/12/5/2468)

**SUPPLEMENTARY MATERIAL 1.**

**Superficial denaturation, n-heptanol:**

RE – right eye (homogenate + vehicle)

LE – left eye (Vehicle)

RE 10h

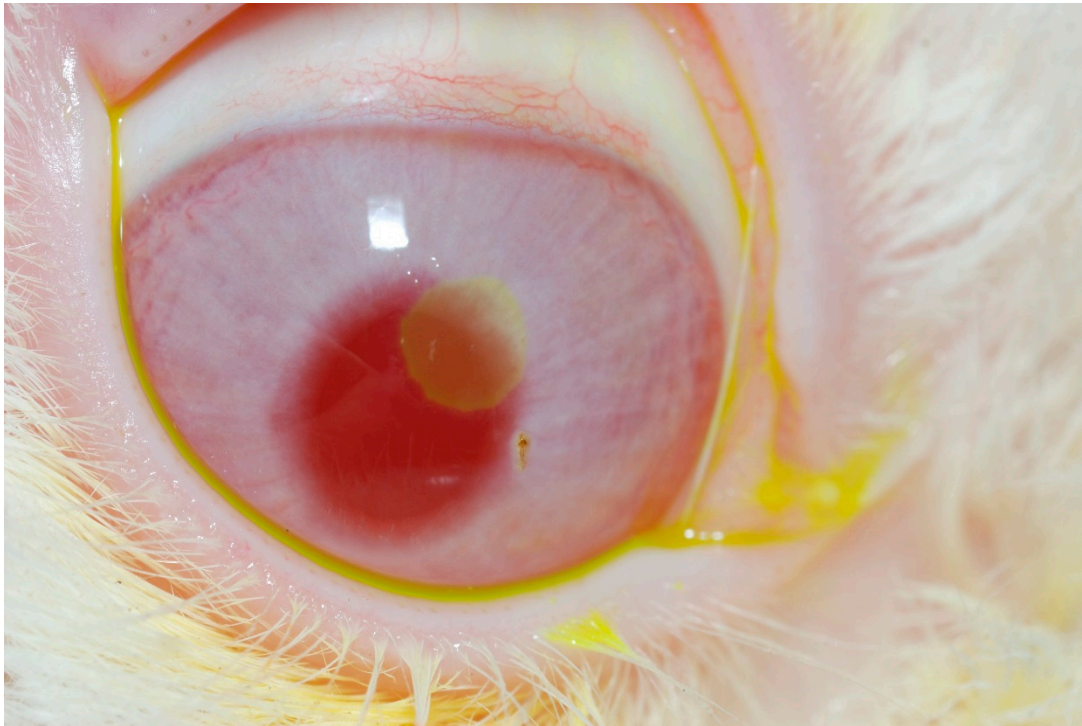

LE 10h

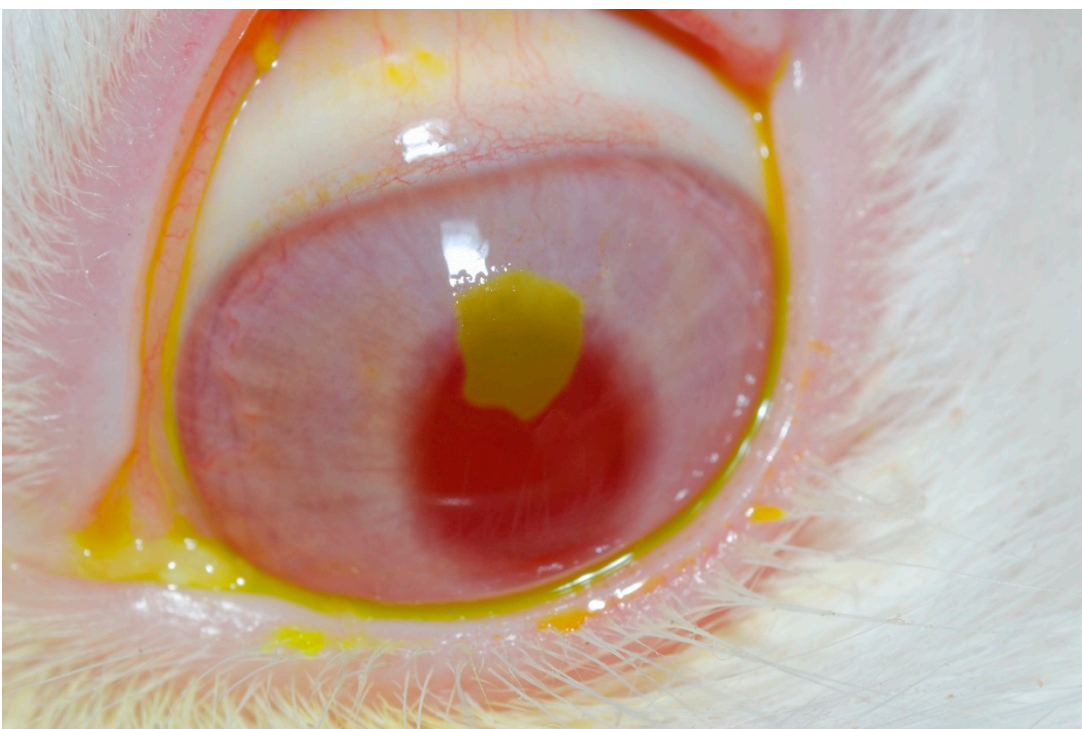

RE 24h

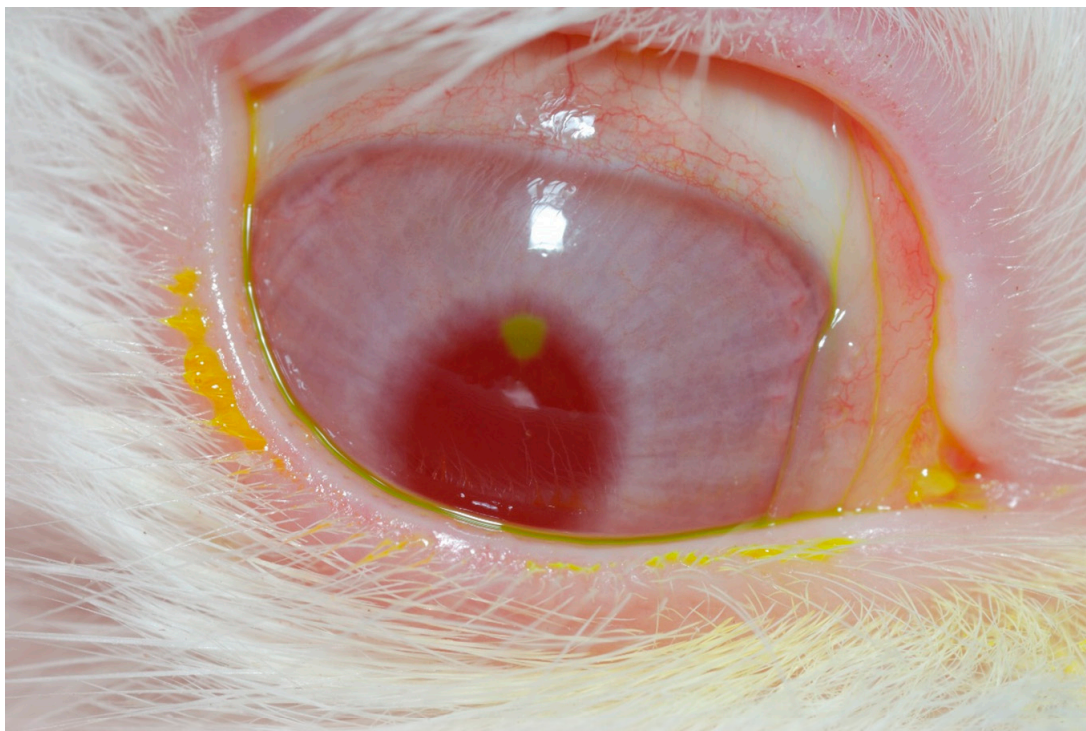

LE 24h

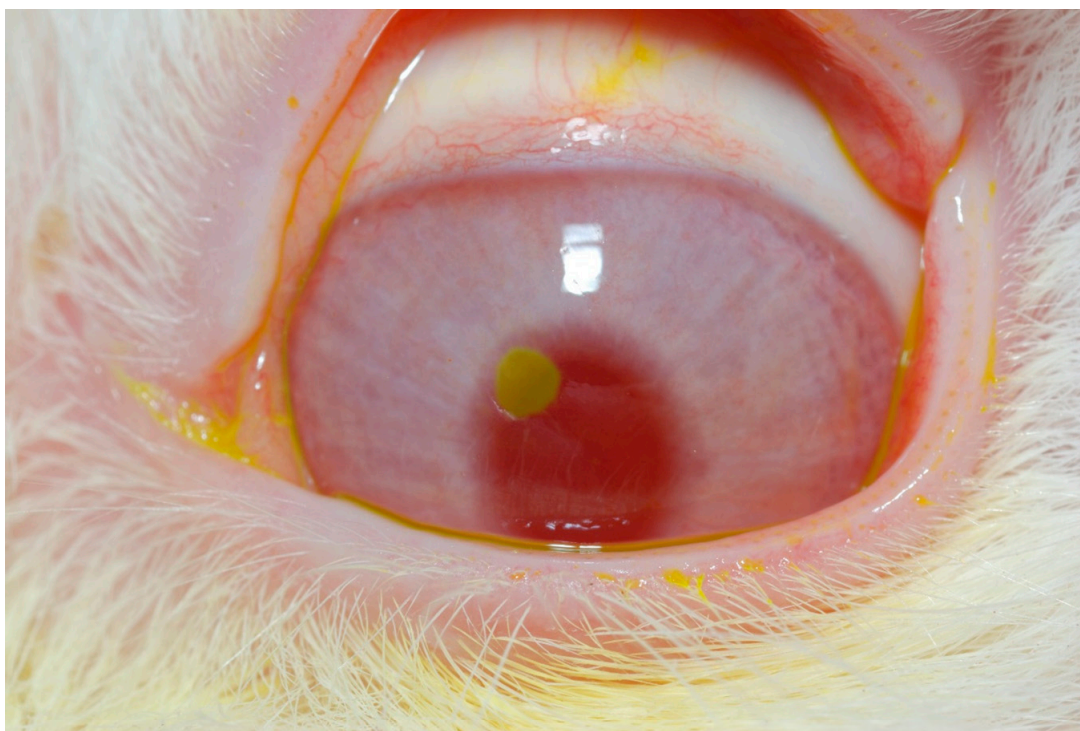



RE 48h

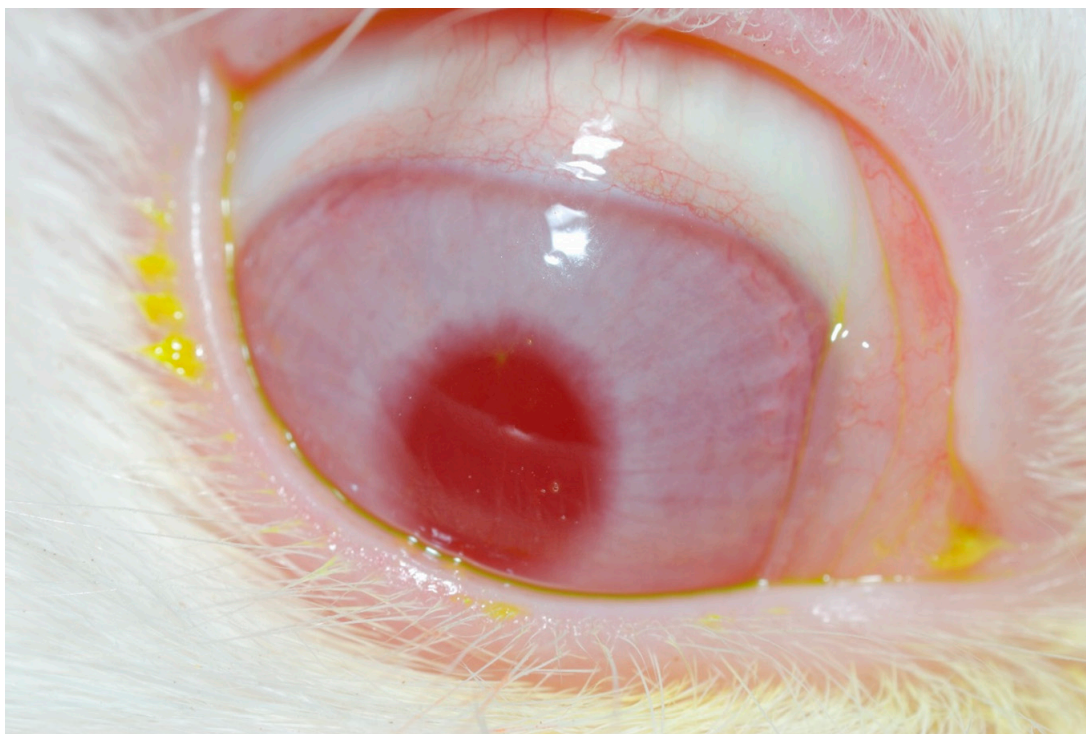

LE 48h

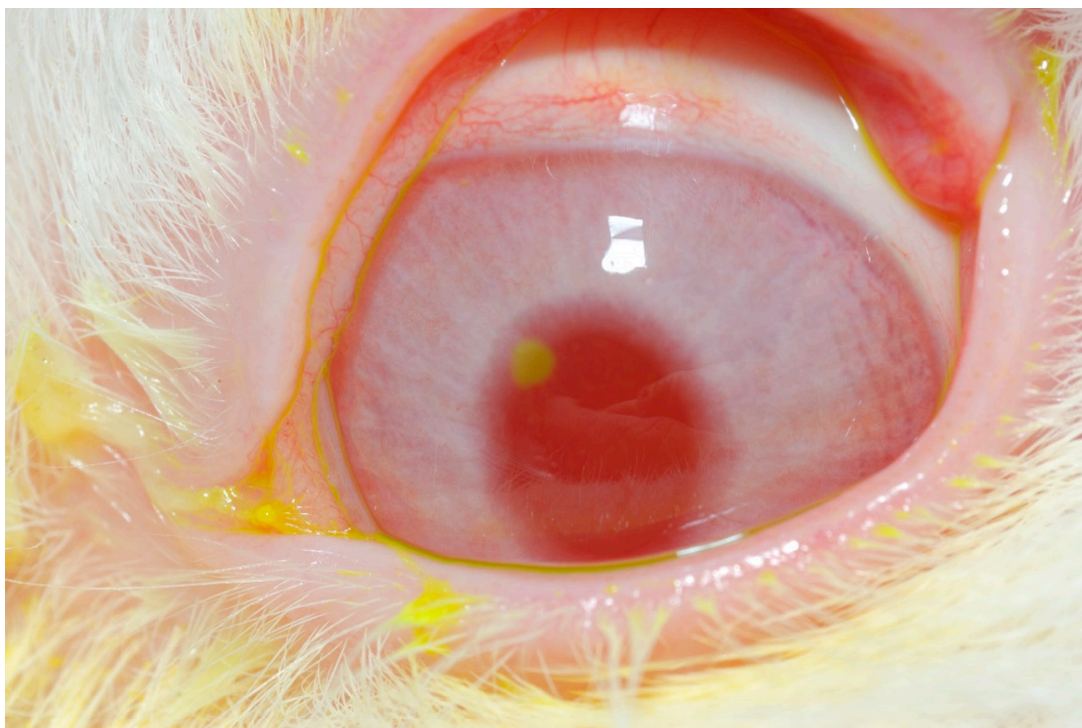

RE 72h

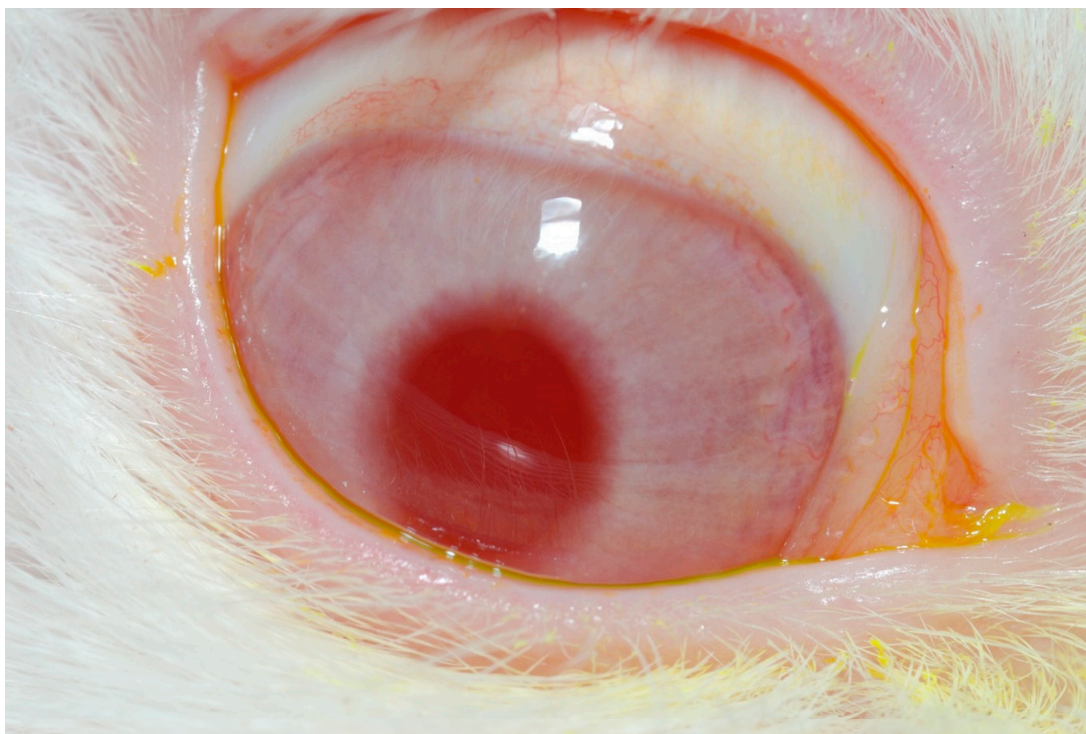

LE 72h

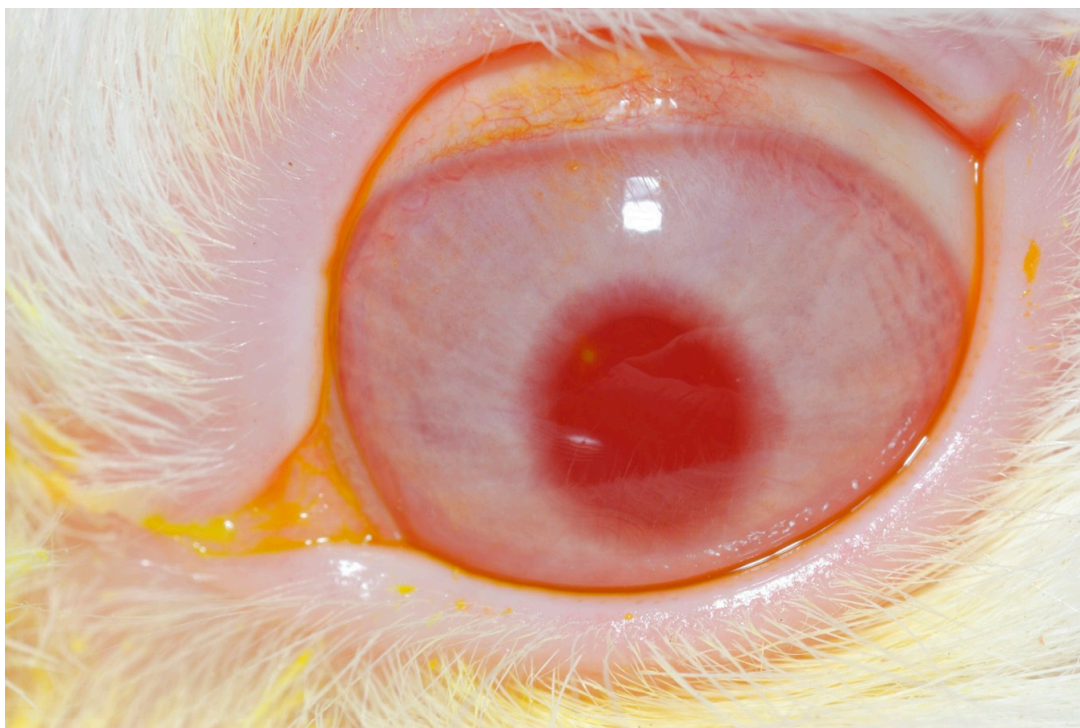



RE 96h

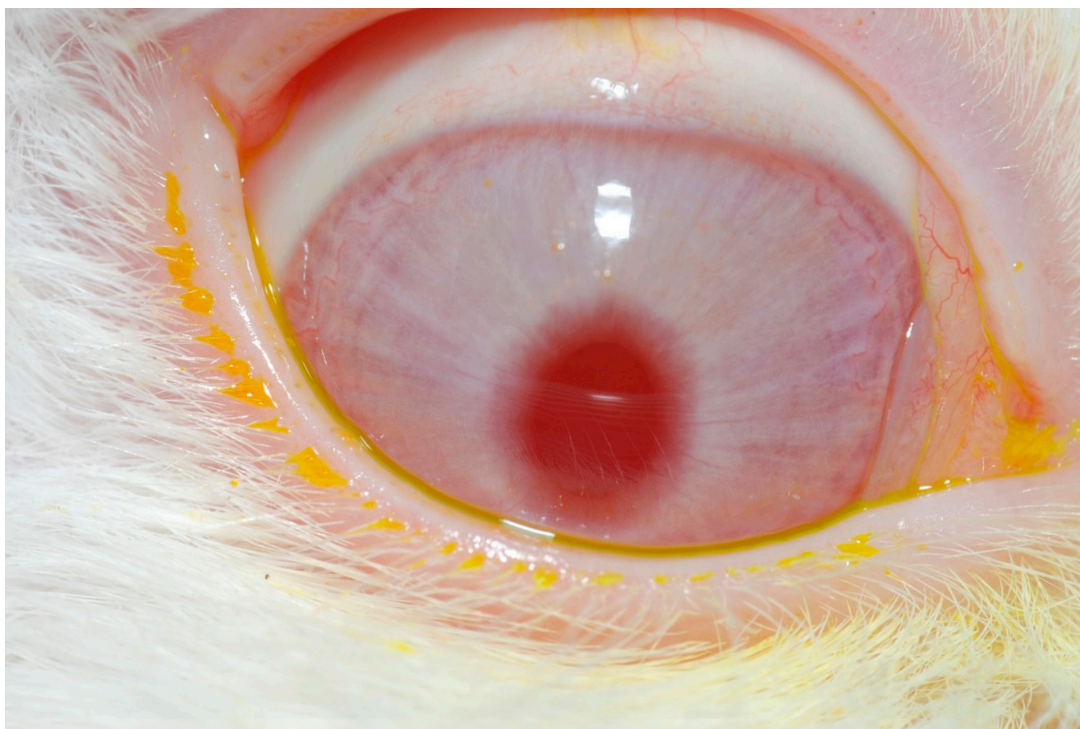

LE 96h

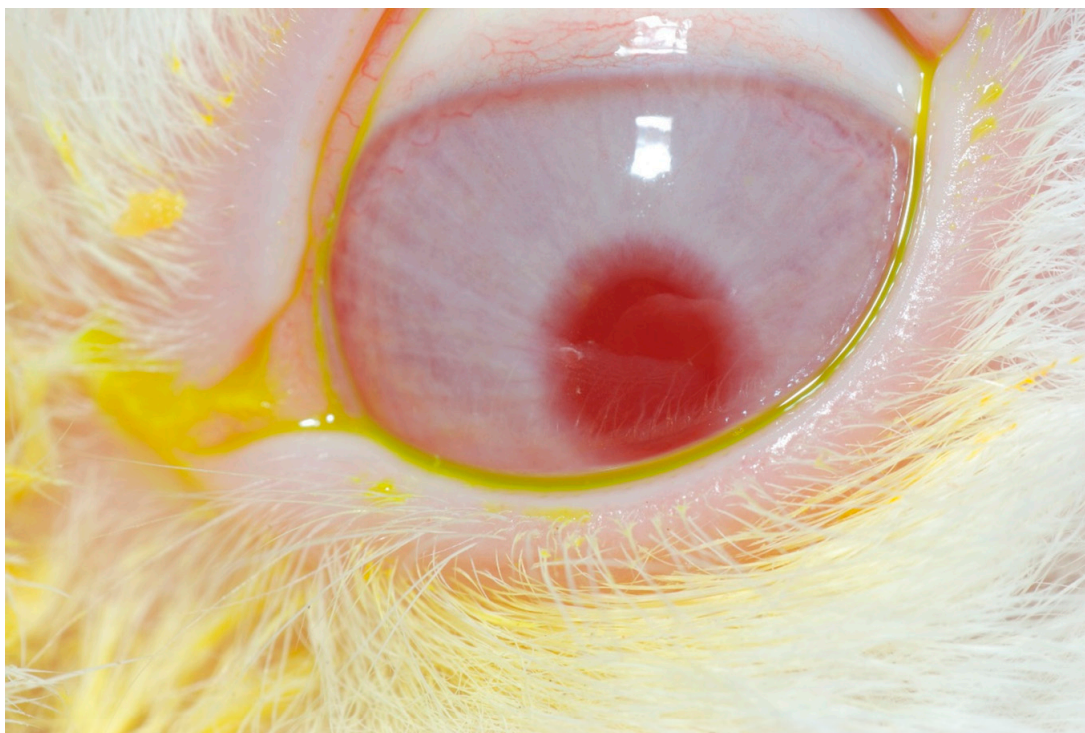

Supplement: s1 [file s1]
